# Supplementary material
Source: publisher figshare collection journal article supplement (https://sage.figshare.com/ndownloader/files/17722565)
Supplement: Supplementary file 1 [file 17722565]

# The Protestant Ethic Re-Examined: Calvinism and Industrialization

## Online Appendix

August 8, 2018

### List of Tables

|    |                                                                                                                                                                                                                                                                                                 |   |
|----|-------------------------------------------------------------------------------------------------------------------------------------------------------------------------------------------------------------------------------------------------------------------------------------------------|---|
| A1 | Sharp RDD results, for various sets of controls: elevation, roughness, and initial population. Local-linear polynomial with CTT bandwidth. Coefficient is estimated effect on population growth 1860-1910 of being located on the Fribourg side of the border. . . . .                          | 2 |
| A2 | Sharp RDD results, for various sets of controls: elevation, roughness, and initial population. Local-linear polynomial with CTT bandwidth. Coefficient is estimated effect on the percentage population growth rate from 1860-1910 of being located on the Fribourg side of the border. . . . . | 2 |
| A3 | Agricultural employment rates (percent) for Fribourg and Vaud districts containing villages included in RDD samples. Linear regression. Data from Van der Walle (1980). . . . .                                                                                                                 | 3 |
| A4 | Post-primary education rates (percent) for Fribourg and Vaud districts containing villages included in RDD samples. Population-weighted linear regression. Data from Van der Walle (1980). . . . .                                                                                              | 3 |
| A5 | Regression results for Fribourg, showing correlation between proportion Catholic and growth. . . . .                                                                                                                                                                                            | 4 |
| A6 | Fertility index (Coale's index $I_f$ ) for Fribourg and Vaud districts containing villages included in RDD samples. Population-weighted linear regression. Data from Van der Walle (1980). . . . .                                                                                              | 4 |
| A7 | Infant mortality rate (per 1000) for Fribourg and Vaud districts containing villages included in RDD samples. Population-weighted linear regression. Data from Van der Walle (1980). . . . .                                                                                                    | 5 |
| A8 | Total mortality rate (per 1000) for Fribourg and Vaud districts containing villages included in RDD samples. Population-weighted linear regression. Data from Van der Walle (1980). . . . .                                                                                                     | 5 |

| Sharp RDD      |           |                |                               |                                              |
|----------------|-----------|----------------|-------------------------------|----------------------------------------------|
|                | Model 1   | Model 2        | Model 3                       | Model 4                                      |
| Coefficient    | 54        | 53             | 50                            | 47                                           |
| (Std. Error)   | (25)      | (24)           | (24)                          | (19)                                         |
| P-value        | 0.029**   | 0.030**        | 0.038**                       | 0.014**                                      |
| Vaud Obs.      | 99        | 100            | 101                           | 110                                          |
| Fribourg Obs.  | 117       | 119            | 122                           | 140                                          |
| Bandwidth [km] | 4.6       | 4.7            | 4.8                           | 5.7                                          |
| Controls       | <i>No</i> | Elev., Rough., | Elev., Rough.,<br>Lat., Long. | Elev., Rough.,<br>Lat., Long.,<br>1860. Pop. |
| Sample Frame   | Pop. < 1k | Pop. < 1k      | Pop. < 1k                     | Pop. < 1k                                    |

Table A1: Sharp RDD results, for various sets of controls: elevation, roughness, and initial population. Local-linear polynomial with CTT bandwidth. Coefficient is estimated effect on population growth 1860-1910 of being located on the Fribourg side of the border.

| Sharp RDD: Percent Growth Rate as DV |           |                |                               |                                              |
|--------------------------------------|-----------|----------------|-------------------------------|----------------------------------------------|
|                                      | Model 1   | Model 2        | Model 3                       | Model 4                                      |
| Coefficient                          | 0.37      | 0.37           | 0.36                          | 0.35                                         |
| (Std. Error)                         | (0.12)    | (0.12)         | (0.12)                        | (0.12)                                       |
| P-value                              | 0.0018*** | 0.0015***      | 0.0025***                     | 0.0026***                                    |
| Vaud Obs.                            | 106       | 107            | 109                           | 110                                          |
| Fribourg Obs.                        | 135       | 137            | 138                           | 140                                          |
| Bandwidth [km]                       | 5.3       | 5.4            | 5.5                           | 5.8                                          |
| Controls                             | <i>No</i> | Elev., Rough., | Elev., Rough.,<br>Lat., Long. | Elev., Rough.,<br>Lat., Long.,<br>1860. Pop. |
| Sample Frame                         | Pop. < 1k | Pop. < 1k      | Pop. < 1k                     | Pop. < 1k                                    |

Table A2: Sharp RDD results, for various sets of controls: elevation, roughness, and initial population. Local-linear polynomial with CTT bandwidth. Coefficient is estimated effect on the percentage population growth rate from 1860-1910 of being located on the Fribourg side of the border.

| Agricultural Employment Rates, Fribourg vs. Vaud |       |
|--------------------------------------------------|-------|
|                                                  | 1870  |
| Vaud Coefficient                                 | -5.4  |
| (Std. Error)                                     | (6.4) |
| P-value                                          | 0.41  |
| Intercept                                        | 59.6  |
| (Std. Error)                                     | (4.7) |
| Districts (N)                                    | 16    |

Table A3: Agricultural employment rates (percent) for Fribourg and Vaud districts containing villages included in RDD samples. Linear regression. Data from Van der Walle (1980).

| Post-Primary Education Rates, Fribourg vs. Vaud |        |        |        |
|-------------------------------------------------|--------|--------|--------|
|                                                 | 1870   | 1888   | 1910   |
| Vaud Coefficient                                | -0.15  | 0.06   | 2.42   |
| (Std. Error)                                    | (2.56) | (2.57) | (3.55) |
| P-value                                         | 0.95   | 0.98   | 0.51   |
| Intercept                                       | 10.54  | 9.18   | 16.15  |
| (Std. Error)                                    | (1.88) | (1.88) | (2.56) |
| Districts (N)                                   | 16     | 16     | 16     |

Table A4: Post-primary education rates (percent) for Fribourg and Vaud districts containing villages included in RDD samples. Population-weighted linear regression. Data from Van der Walle (1980).

| Robust linear regression |                                   |                        |                        |                        |
|--------------------------|-----------------------------------|------------------------|------------------------|------------------------|
|                          | <i>Dependent variable: Growth</i> |                        |                        |                        |
|                          | Model 1                           | Model 2                | Model 3                | Model 4                |
| Pct. Catholic            | 28<br>(16)*                       | 38<br>(15)**           | 21<br>(16)             | 35<br>(16)**           |
| Elevation                |                                   | -0.04<br>(0.05)        |                        | -0.04<br>(0.05)        |
| Roughness                |                                   | -0.04<br>(0.04)        |                        | -0.04<br>(0.04)        |
| Longitude                |                                   | 143<br>(35)***         |                        | 123<br>37              |
| Latitude                 |                                   | -123<br>(65)*          |                        | -114<br>(68)*          |
| Pop. 1860                |                                   | 0.22<br>(0.02)***      |                        | 0.25<br>(0.01)***      |
| Intercept                | 20<br>(15)                        | 4726<br>(2921)         | 30<br>(15)**           | 4445<br>(3068)         |
| Sample Frame             | Pop. < 1k,<br>Fribourg            | Pop. < 1k,<br>Fribourg | Pop. < 2k,<br>Fribourg | Pop. < 2k,<br>Fribourg |
| Observations             | 263                               | 263                    | 272                    | 272                    |
| <i>Note:</i>             | *p<0.1; **p<0.05; ***p<0.01       |                        |                        |                        |

Table A5: Regression results for Fribourg, showing correlation between proportion Catholic and growth.

| Fertility Index, Fribourg vs. Vaud |         |         |         |
|------------------------------------|---------|---------|---------|
|                                    | 1870    | 1888    | 1910    |
| Vaud Coefficient                   | 0.003   | -0.041  | -0.108  |
| (Std. Error)                       | (0.024) | (0.026) | (0.027) |
| P-value                            | 0.899   | 0.142   | 0.001** |
| Intercept                          | 0.329   | 0.373   | 0.362   |
| (Std. Error)                       | (0.017) | (0.019) | (0.020) |
| Districts (N)                      | 16      | 16      | 16      |

Table A6: Fertility index (Coale's index  $I_f$ ) for Fribourg and Vaud districts containing villages included in RDD samples. Population-weighted linear regression. Data from Van der Walle (1980).

| Infant mortality rate (per 1000), Fribourg vs. Vaud |        |        |         |
|-----------------------------------------------------|--------|--------|---------|
|                                                     | 1870   | 1888   | 1910    |
| Vaud Coefficient                                    | -30.4  | -19.5  | -44.7   |
| (Std. Error)                                        | (11.8) | (7.5)  | (12.0)  |
| P-value                                             | 0.022* | 0.021* | 0.002** |
| Intercept                                           | 270    | 233    | 186     |
| (Std. Error)                                        | (9)    | (5)    | (9)     |
| Districts (N)                                       | 16     | 16     | 16      |

Table A7: Infant mortality rate (per 1000) for Fribourg and Vaud districts containing villages included in RDD samples. Population-weighted linear regression. Data from Van der Walle (1980).

| Total mortality rate (per 1000), Fribourg vs. Vaud |         |
|----------------------------------------------------|---------|
|                                                    | 1910    |
| Vaud Coefficient                                   | -3.20   |
| (Std. Error)                                       | (0.87)  |
| P-value                                            | 0.002** |
| Intercept                                          | 20.4    |
| (Std. Error)                                       | (0.64)  |
| Districts (N)                                      | 16      |

Table A8: Total mortality rate (per 1000) for Fribourg and Vaud districts containing villages included in RDD samples. Population-weighted linear regression. Data from Van der Walle (1980).
